# Supplementary material for: Celastrol Suppresses Glioma Vasculogenic Mimicry Formation and Angiogenesis by Blocking the PI3K/Akt/mTOR Signaling Pathway
Source: PubMed Central journal article supplement (PMC7025498; doi:10.3389/fphar.2020.00025), 2020-02-06
Supplement: DataSheet_1.pdf [file DataSheet_1.pdf]

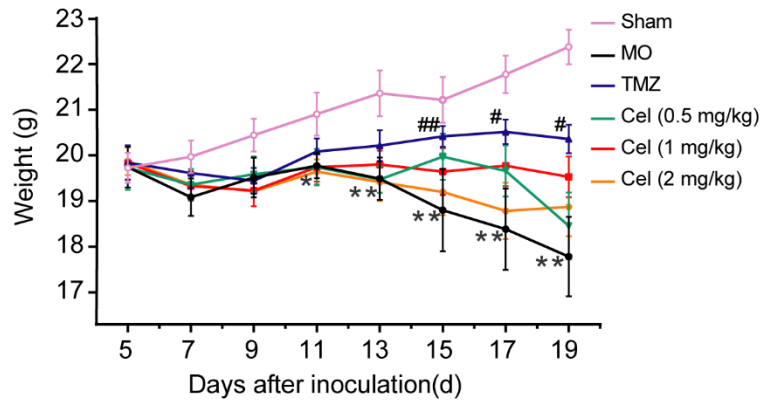

**Supplementary Figure 1.** Body weigh change in mice during the time of intraperitoneal injection of corresponding drugs. Data expressed as mean  $\pm$  SEM, \* $P$ <0.05, \*\* $P$ <0.01 vs sham operated (Sham) group. # $P$ <0.05, ## $P$ <0.01 vs model (MO) group.

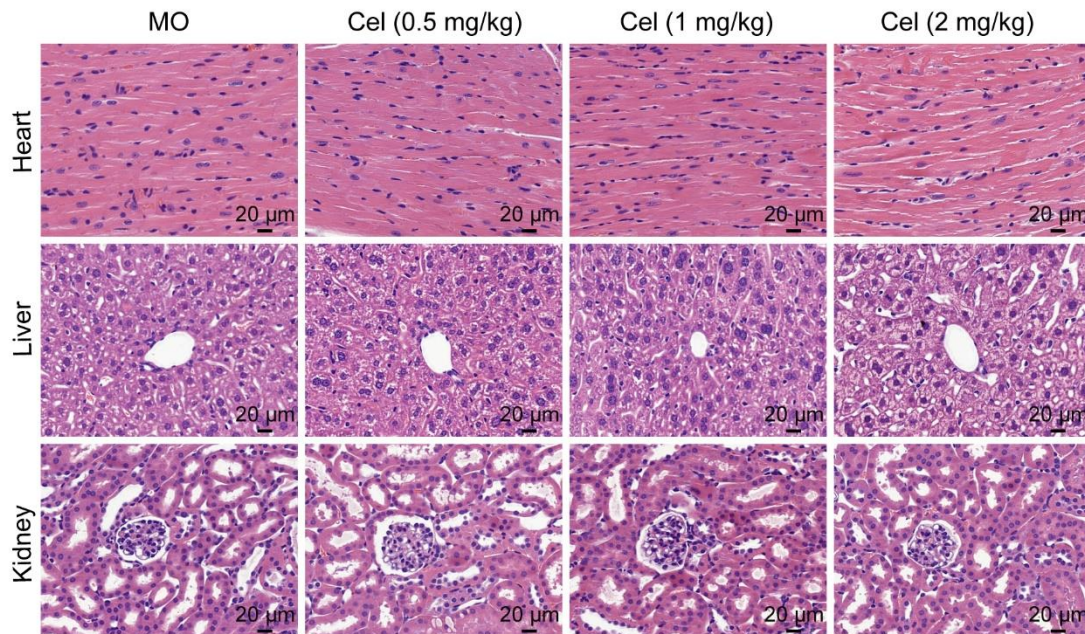

**Supplementary Figure 2.** H&E staining of heart, liver and kidney for analysis of celastrol toxicity.
